# Supplementary material
Source: Springer Nature journal article supplement (https://www.springermedizin.de/resource/supplementary/13012_2013_737_MOESM2_ESM.pdf/9630570)
Supplement: MOESM2 [file 9630570]

## **Baseline Patient Consultation**

One-day meetings conducted in all study sites (n=6)  
n=83 Patients

- Share individual patients' experience of care
- Receive information about local primary care services
- Vote on local healthcare improvement priorities ("patients' consultation")

## **Cluster randomization**

### **Intervention (Patient involvement)**

n=3 Study Sites  
n=44 Professionals  
n=17 Patients

- Receive feedback on patients' consultation
- Deliberate on local improvement priorities with patients and professionals

### **Control (No patient involvement)**

n=3 Study Sites  
n=45 Professionals

- No feedback on patients' consultation
- Deliberate on local improvement priorities with professionals only

## **Outcomes**

1. Healthcare improvement priorities
2. Intention to use the selected quality indicators
3. Costs of priority-setting
